# Supplementary material for: Spatial multiomics map of trophoblast development in early pregnancy
Source: PubMed Central journal article supplement (PMC10076224; doi:10.1038/s41586-023-05869-0), 2023-03-29
Supplement: 41586_2023_5869_MOESM1_ESM.pdf [file 41586_2023_5869_MOESM1_ESM.pdf]

**Supplementary information**

---

**Spatial multiomics map of trophoblast development in early pregnancy**

---

In the format provided by the authors and unedited

## Supplementary Material

### Supplementary Tables

#### **Supplementary Table 1. Supplementary\_Table\_1.xlsx (separate file)**

**Metadata of samples. (A)** 10X scRNA-seq libraries from human donors. **(B)** 10X snRNA-seq libraries from human donors. **(C)** 10X cell-coupled snRNA/ATAC-seq (multiome) libraries from human donors. **(D)** 10X Visium spatial transcriptomics libraries from human donors. **(E)** 10x libraries from organoid samples. **(F)** Metadata for human donors used in the study.

Sample id = 10x reaction; Donor = donor ID; Stage\_PCW = post-conceptual weeks; TP = type of pregnancy termination; Media = organoid growth media; Model = organoid model. (Med: medical; Sur: surgical or Hys: hysterectomy)

#### **Supplementary Table 2. Supplementary\_Table\_2.xlsx (separate file)**

**Quality control of samples for each 10X RNA library in our maternal-fetal interface atlas.**

**(A)** Summary statistics from 10X Cell Ranger 3.0.2 for scRNA-seq samples. **(B)** Summary statistics from 10X Cell Ranger 3.0.2 for snRNA-seq samples. **(C)** Summary statistics from 10X Cell Ranger ARC 1.0.1 for multiome samples. **(D)** Summary statistics from 10X Space Ranger 1.1.0 Visium spatial transcriptomics samples.

#### **Supplementary Table 3. Supplementary\_Table3.xlsx (separate file)**

**Annotation summary for each sample.** Number of cells/nuclei (droplets) per coarse cell state in scRNA-seq, snRNA-seq and multiome samples of donors P13, P14, Hrv43 and all donors dataset.

#### **Supplementary Table 4. Supplementary\_Table4.xlsx (separate file)**

Variance explained (R2 column) in the MEFISTO model by each factor in each modality (RNA or ATAC).

#### **Supplementary Table 5. Supplementary\_Table5.xlsx (separate file)**

Differentially expressed genes (DEG) along trophoblast trajectories in P13. **(A)** TradeSeq test evaluating the association between average gene expression and Slingshot pseudotime (with Wald test using FDR values to rank genes). **(B)** DEG along the EVT trajectory in donor P13 in a retrograde manner (limma, FDR < 0.05, with Bonferroni correction for multiple hypotheses testing). **(C)** DEG along the EVT trajectory in all donors in a retrograde manner (limma, FDR < 0.05, with Bonferroni correction for multiple hypotheses testing)

#### **Supplementary Table 6. Supplementary\_Table5.xlsx (separate file)**

TF analysis along trophoblast trajectory. Table containing the multiple TF measurements in the *in vivo* analysis used to prioritise TF relevant for trophoblast differentiation of all donors **(A)** and for donor P13 **(B)**. All tests are performed by comparing along the trophoblast differentiation axis.

Columns across the table indicate: cluster = cell type; TF = transcription factor; is\_DE\_limma = 1 or 0 (yes/no) if it is a differentially expressed TF (limma, FDR < 0.05, with Bonferroni correction for multiple hypotheses testing); is\_DA\_dorothea = 1 or 0 (yes/no) if it is a differentially activated TF (FDR < 0.05; Wilcoxon test); is\_DA\_chromVar = 1 or 0 (yes/no) if the TF binding motifs are differentially accessible (FDR < 0.05; Wilcoxon test). Finally, is\_evidence indicates the number of supporting evidences found according to all measures.

**Supplementary Table 7. Supplementary\_Table7.xlsx (separate file)**

Trophoblast interactions enriched by microenvironment (ME) using CellPhoneDB. **(A)** ME2 = cytotrophoblast cell column. **(B)** ME3 = Invasion front. **(C)** ME4 = Decidual/myometrial border. **(D)** ME5 = Spiral arteries.

**Supplementary Table 8. Supplementary\_Table8.xlsx (separate file)**

Probes used for multiplexed RNAscope smFISH.
